# Supplementary material for: First Guatemalan record of natural hybridisation between Neotropical species of the Lady’s Slipper orchid (Orchidaceae, Cypripedioideae)
Source: PeerJ. 2017 Dec 22;5:e4162. doi: 10.7717/peerj.4162 (PMC5742529; doi:10.7717/peerj.4162)
Supplement: Data S4 [file peerj-05-4162-s005.xls]

## Sheet: Arkusz2
Species	Country	Collector(s)	Collector nr	Herbarium	Coordinates
C. irapeanum	Guatemala	Véliz & al.	94.3828	BIGU	-90,5286111111111;15,3752777777778
C. irapeanum	Guatemala	Lewis	151	AMES	-90,6469444444445;14,6427777777778
C. irapeanum	Guatemala	Steyermark	50973	AMES, US	-91,875;15,5105555555556
C. irapeanum	Guatemala	Steyermark	47181	AMES	-91,2672222222222;14,6655555555556
C. irapeanum	Honduras	Skinner	s.n.	K	-86,2416666666667;15,225
C. irapeanum	Mexico	Sessé & Mociño	s.n.	MO	-102,575;23,6166666666667
C. irapeanum	Mexico	Bourgeau	2666	MO	-102,575;23,6166666666667
C. irapeanum	Mexico	Shilom Ton	2687	DS	-92,4284833333333;16,5120083333333
C. irapeanum	Mexico	Laughlin	1134	US	-92,87;16,72
C. irapeanum	Mexico	Dressler	1402	AMES	-92,0766666666667;16,9247222222222
C. irapeanum	Mexico	Breedlove & Smith	22069	MO	-92,5930555555556;16,8380555555556
C. irapeanum	Mexico	Breedlove	6462	AMES, DS, LL	-92,47;16,89
C. irapeanum	Mexico	Breedlove	51705	CAS	-92,4997222222222;16,5855555555556
C. irapeanum	Mexico	Breedlove	27069	DS, MO	-92,53;16,53
C. irapeanum	Mexico	Breedlove	11172	DS	-92,36;16,47
C. irapeanum	Mexico	Breedlove	10571	DS, LL	-92,4172222222222;16,4308333333333
C. irapeanum	Mexico	Breedlove	39666	DS	-92,7847222222222;16,7736111111111
C. irapeanum	Mexico	Hinton	9230	herb. Hinton, MO	-101,03;18,12
C. irapeanum	Mexico	Hinton & Hinton	14420	herb. Hinton	-100,454722222222;17,9552777777778
C. irapeanum	Mexico	Hinton	4438	herb. Hinton	-100,17;19,04
C. irapeanum	Mexico	Hinton	1186	herb. Hinton	-99,7833333333333;19,1
C. irapeanum	Mexico	Hinton	1208	herb. Hinton, MO	-100,05;19,0333333333333
C. irapeanum	Mexico	Nagel & González	1302	MO	-99,3166666666667;18,9833333333333
C. irapeanum	Mexico	Stevens & al.	2483	MSC	-96,4833333333333;17,3166666666667
C. irapeanum	Mexico	Hunn	OAX-1567	MEXU, MO, WTU	-96,3002777777778;16,3016666666667
C. irapeanum	Mexico	Stevens	1211	MSC	-96,3333333333333;16,8166666666667
C. irapeanum	Mexico	Gentry	6567	MO	-107,65;25,9
C. molle	Mexico	Molseed	266	MO	-96,4363888888889;16,2075
C. molle	Mexico	García-Mendoza	1106	MO	-97,4236111111111;17,5486111111111
C. molle	Mexico	Salinas T. & Tenorio L.	F-3301	MO	-97,8166666666667;17,8666666666667
C. molle	Mexico	Sousa S. & al.	7799	MO	-97,3616666666667;17,6080555555556
C. molle	Mexico	Tenorio L. & Salinas T.	11565	MO	-97,8166666666667;17,8333333333333
C. molle	Mexico	Ceja & al.	683	AMO	-96,9383333333333;17,3427777777778
C. molle	Mexico	Garcia-Cruz & al.	649	AMO	-97,7791666666667;17,8097222222222
C. molle	Mexico	Withner	s.n.	AMO	-96,3991666666667;16,9186111111111
C. molle	Mexico	Greenwood	s.n.	AMO	-96,3663888888889;16,8822222222222
C. dickinsonianum	Guatemala	Véliz & al.	94.3829	BIGU, MEXU	-90,4797222222222;15,3647222222222
C. dickinsonianum	Mexico	Dickinson	s.n.	AMO	-92,1155555555555;16,23
C. dickinsonianum	Mexico	Hartmann	s.n.	MEXU	-91,683412;16.084331

## Sheet: Arkusz3
Spec,X_Long,Y_Lat
irapeanum,-90.5286111111111,15.3752777777778
irapeanum,-90.6469444444445,14.6427777777778
irapeanum,-91.875,15.5105555555556
irapeanum,-91.2672222222222,14.6655555555556
irapeanum,-86.2416666666667,15.225
irapeanum,-102.575,23.6166666666667
irapeanum,-102.575,23.6166666666667
irapeanum,-92.4284833333333,16.5120083333333
irapeanum,-92.87,16.72
irapeanum,-92.0766666666667,16.9247222222222
irapeanum,-92.5930555555556,16.8380555555556
irapeanum,-92.47,16.89
irapeanum,-92.4997222222222,16.5855555555556
irapeanum,-92.53,16.53
irapeanum,-92.36,16.47
irapeanum,-92.4172222222222,16.4308333333333
irapeanum,-92.7847222222222,16.7736111111111
irapeanum,-101.03,18.12
irapeanum,-100.454722222222,17.9552777777778
irapeanum,-100.17,19.04
irapeanum,-99.7833333333333,19.1
irapeanum,-100.05,19.0333333333333
irapeanum,-99.3166666666667,18.9833333333333
irapeanum,-96.4833333333333,17.3166666666667
irapeanum,-96.3002777777778,16.3016666666667
irapeanum,-96.3333333333333,16.8166666666667
irapeanum,-107.65,25.9
molle,-96.4363888888889,16.2075
molle,-97.4236111111111,17.5486111111111
molle,-97.8166666666667,17.8666666666667
molle,-97.3616666666667,17.6080555555556
molle,-97.8166666666667,17.8333333333333
molle,-96.9383333333333,17.3427777777778
molle,-97.7791666666667,17.8097222222222
molle,-96.3991666666667,16.9186111111111
molle,-96.3663888888889,16.8822222222222
dickinsonianum,-90.4797222222222,15.3647222222222
dickinsonianum,-92.1155555555555,16.23
dickinsonianum,-91.683412,16.084331
