# Supplementary material for: First Guatemalan record of natural hybridisation between Neotropical species of the Lady’s Slipper orchid (Orchidaceae, Cypripedioideae)
Source: PeerJ. 2017 Dec 22;5:e4162. doi: 10.7717/peerj.4162 (PMC5742529; doi:10.7717/peerj.4162)
Supplement: Data S5 [file peerj-05-4162-s006.xls]

## Sheet: Arkusz1
Species	Coordinates
C. irapeanum	-90.5286111111111; 15.3752777777778
C. irapeanum	-91.875; 15.5105555555556
C. irapeanum	-91.2672222222222; 14.6655555555556
C. irapeanum	-86.2416666666667; 15.225
C. irapeanum	-102.575; 23.6166666666667
C. irapeanum	-92.4284833333333; 16.5120083333333
C. irapeanum	-92.0766666666667; 16.9247222222222
C. irapeanum	-101.03; 18.12.2017
C. irapeanum	-99.7833333333333; 19.01.2017
C. irapeanum	-100.05; 19.0333333333333
C. irapeanum	-99.3166666666667; 18.9833333333333
C. irapeanum	-96.4833333333333; 17.3166666666667
C. irapeanum	-96.3002777777778; 16.3016666666667
C. irapeanum	-107.65; 25.09.2017
C. molle	-96.4363888888889; 16.2075
C. molle	-96.9383333333333; 17.3427777777778
C. molle	-97.7791666666667; 17.8097222222222
C. molle	-96.3991666666667; 16.9186111111111
C. dickinsonianum	-90.4797222222222; 15.3647222222222
C. dickinsonianum	-92.1155555555555; 16.23
C. dickinsonianum	-91.683412; 16.084331
